# Supplementary material for: Fluorescence imaging of hydroxyl radicals at superhydrophobic gold flower-like surface in photocatalytic system
Source: Royal Society of Chemistry journal article supplement (doi:10.1039/c0an00821d), 2011-01-01
Supplement: c0an00821d.pdf [file c0an00821d.pdf]

## **Supplementary Information**

# **Fluorescence imaging of hydroxyl radicals at superhydrophobic gold flower-like surface in photocatalytic system**

Yan Liu, Anwei Zhu, Yang Tian\*

Department of Chemistry, Tongji University, Siping Road 1239, Shanghai 200092, People's Republic of  
China

- 1. Experimental**
- 2. Dependence of the width of fluorescence microbands on irradiation time**
- 3. Selectivity of the present assaying method**
- 4. Home-made photocatalyst flow cell for the determination of H<sub>2</sub>O<sub>2</sub>**

## 1. Experimental

### *Chemicals and materials*

1-Octadecanethiol (ODT) and sodium molybdenum oxide dihydrate were purchased from Alfa Aesar. Hydrogen tetrachloroaurate (III) trihydrate ( $\text{HAuCl}_4 \cdot 3\text{H}_2\text{O}$ , 99.99%), homovanillic acid (3-methoxy-4-hydroxyphenylacetic acid, HVA), horseradish peroxidase (POD), 2,2-Azobis (2-amidinopropane) dihydrochloride (AAPH), and potassium superoxide ( $\text{KO}_2$ ) were all purchased from Aldrich. Peroxynitrite was obtained from R&D Systems. An anatase  $\text{TiO}_2$  sol (STS-21, 20 nm particle diameter) and  $\text{TiO}_2$  nanoneedles (FT-2000,  $\sim 50$ – $100$  nm in width and  $\sim 3$ – $5$   $\mu\text{m}$  in length) were obtained from Ishihara Sangyo Kaish. All other reagents were of analytical grade and used as received. All solutions were prepared with Milli-Q water. ITO-coated glass plates with a square resistance of  $\sim 10$ – $20 \Omega \text{ cm}^{-2}$  were obtained from Nanbo (Shenzhen, China). Our experiments were operated at room temperature and the relative humidity was 60%, unless otherwise noted.

### *Preparation of gold flower-like nanostructures and $\text{TiO}_2$ -coated photomask*

Gold flower-like nanostructures were electrodeposited onto an indium tin oxide (ITO)-coated glass plate ( $1 \times 1 \text{ cm}^2$ ) from 40 mM  $\text{HAuCl}_4$  solution at  $-0.08 \text{ V}$  versus  $\text{Ag}|\text{AgCl}$  (in saturated  $\text{KCl}$ ) for 5 min. The  $\text{TiO}_2$ -coated photomask was prepared as follows: the designed photomask ( $1 \times 1 \text{ cm}^2$ ) was covered with  $\text{TiO}_2$  sol by spin-coating method and then sintered at 723 K for 60 min, and the optimized thickness of  $\text{TiO}_2$  film with high photocatalytic activity is  $\sim 3 \mu\text{m}$ .

### ***Generation of free radicals***

In selectivity test, superoxide anion ( $O_2^-$ ) was chemically generated by ionization of potassium superoxide ( $KO_2$ ) in aqueous solution.<sup>S1</sup> Singlet oxygen ( $^1O_2$ ) was generated as a product of the disproportionation of  $H_2O_2$  in basic aqueous solution catalyzed by molybdate ions.<sup>S2</sup> Alkyl peroxy radical ( $ROO\cdot$ ) was generated through thermolysis of 2,2-Azobis (2-amidinopropane) dihydrochloride (AAPH) in aqueous solution under elevated temperature (310 K).<sup>S3</sup> Peroxynitrite ( $ONOO^-$ ) was obtained by diluting commercially available peroxynitrite solution with a strongly basic solution (0.1 M NaOH). Hydroxyl radical ( $HO\cdot$ ) was generated by the Fenton Chemistry. Their influences on the water contact angle of ODT-modified gold film were all obtained after 20 min reaction time.

### ***Staining of the hydrophilic region by rhodamine B***

The hydrophilic region of the obtained superhydrophobic|philic microband was stained by dropping 0.1 ml of 50 mM rhodamine B aqueous solution on gold film for 10 s and then fluorescence imaged after throwing off the droplet.

### ***Apparatus and measurements***

Fluorescence micrographs were acquired on a Nikon Model Eclipse TE300 inverted microscopy. Scanning electron microscopy (SEM) images were collected with a Hitachi Model S-4500 instrument. The X-ray diffraction (XRD) measurements were carried out via a BRUKER D8 diffractometer (Bruker, German), using  $Cu\ K\alpha_1$  radiation ( $\lambda = 1.54\ \text{\AA}$ ) over the  $2\theta$  range of  $10^\circ$  to  $70^\circ$ . X-ray photoelectron spectroscopy (XPS) (Model PHI 5000) was used to characterize the modification and decomposition of ODT. The water contact angle was measured by a contact angle meter (Model JC 2000A, Shanghai, China). Fluorescence spectrum was determined with a Perkin-Elmer LS-55

spectrophotometer, and the excitation and emission slits were both 5 nm. A home-made photocatalyst flow cell was prepared as follows: A TiO<sub>2</sub>-coated ITO glass plate and a bare glass plate were faced to each other with a small intervening gap (~50 μm), and the sides were sealed with glass plates and silicone except for inlet and outlet tubes. The TiO<sub>2</sub> side was exposed to UV light (70 mW cm<sup>-2</sup>) with a cold mirror filter attached. The purified air passed through the photocatalyst cell (2 ml min<sup>-1</sup>) and the out-flowing gas from the irradiated cell was flushed through a 3 ml optimized collecting solution containing 0.1 M tris buffer (pH 8.50), 2.5 mM homovanillic acid (3-methoxy-4-hydroxyphenylacetic acid, HVA), and 2.0 U ml<sup>-1</sup> horseradish peroxidase (POD) for a reaction time of 30 min at 298 K. The relative humidity was 60%, and the room temperature was 298 K, unless otherwise noted.

## 2. Dependence of the width of fluorescence microbands on irradiation time

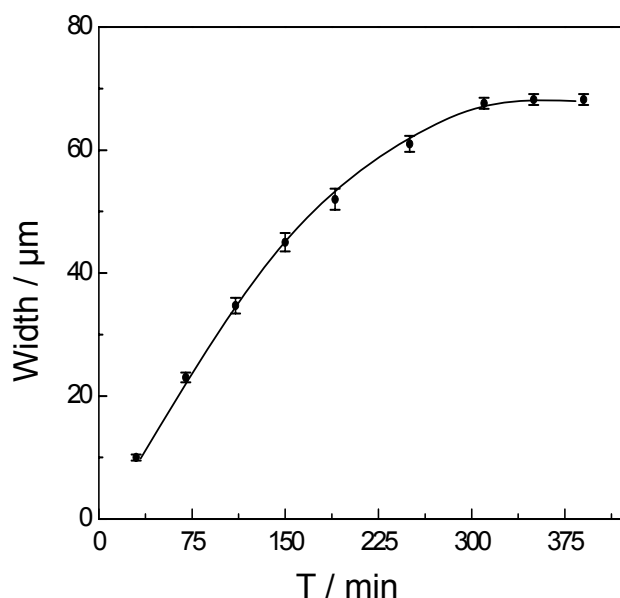

**Fig. S1** Dependence of the average width of fluorescence microbands on time of exposure of the ODT-modified gold flower-like film to UV light (70 mW cm<sup>-2</sup>). The error bars were obtained from a set of ODT-modified gold films.

### 3. Selectivity of the present assaying method

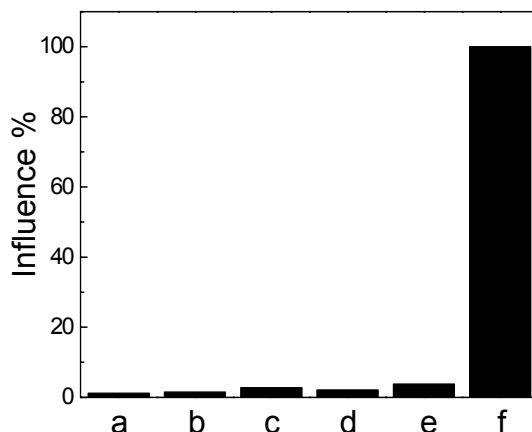

**Fig. S2** Influence on the water contact angle decrease obtained at the ODT modified gold flower-like film imposed by (a)  $\text{H}_2\text{O}_2$ , (b)  $\text{O}_2^-$ , (c)  $^1\text{O}_2$ , (d)  $\text{ONOO}^-$ , (e)  $\text{ROO}^\cdot$ , and (f)  $\text{HO}^\cdot$ . The influence by each species was the average value obtained from three independent experiments.

### 4. Home-made photocatalyst flow cell for the determination of $\text{H}_2\text{O}_2$

**Scheme S1.** Schematic illustration of the experimental device for the detection of  $\text{H}_2\text{O}_2$  released from  $\text{TiO}_2$  to air.

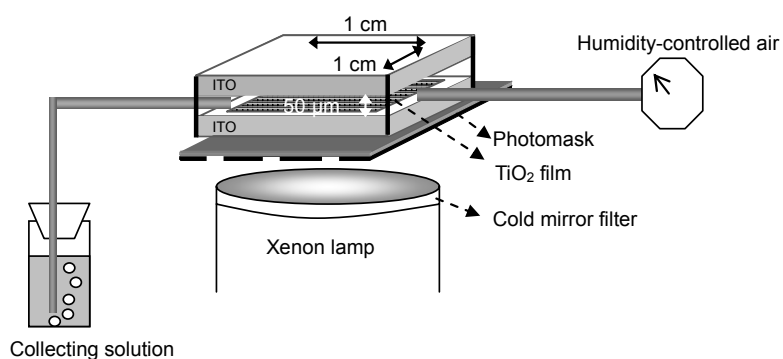

## References

- S1. B. Ge, F. Lisdar, *Anal. Chim. Acta.*, 2002, **454**, 53.  
S2. J. M. Aubry, B. Cazin, *Inorg. Chem.*, 1988, **27**, 2013.  
S3. H. Loertzer, S. Bauer, W. Moerke, P. Fornara, H. J. Broemme, *Transplant. Proc.*, 2006, **38**, 674.
